# Supplementary material
Source: MDPI journal article supplement (https://www.mdpi.com/2076-3417/10/18/6480)
Supplement: s1 [file s1]

Article

# Creating incremental models of indoor environments through omnidirectional imaging

Vicente Román <sup>1,†,‡,\*</sup>, Luis Payá <sup>1,‡</sup>, Sergio Cebollada <sup>1,‡</sup>, Óscar Reinoso <sup>1,‡</sup>

Department of Systems Engineering and Automation, Miguel Hernández University, 03202 Elche, Spain; lpaya@umh.es (L.P.); sergio.cebollada@umh.es (S.C.); o.reinoso@umh.es (Ó.R.)

\* Correspondence: v.roman@umh.es; Tel.: +34-96-665-2435

† Current address: Avda. de la Universidad, s/n. Ed. Innova. Elche (03202), Alicante (Spain)

‡ These authors contributed equally to this work.

Academic Editor: name

Version September 16, 2020 submitted to Appl. Sci.; Typeset by L<sup>A</sup>T<sub>E</sub>X using class file mdpi.cls

## 1. Supplementary Materials

**Table 1.** Table S1: General parameters of the global appearance descriptors

| Parameter | Definition                                |
|-----------|-------------------------------------------|
| $N_x$     | Number of rows of the panoramic image.    |
| $N_y$     | Number of columns of the panoramic image. |
| $D_x$     | Derivative of the image regarding axis x. |
| $D_y$     | Derivative of the image regarding axis y. |
| $G$       | Module of the gradient.                   |
| $\theta$  | Orientation of the gradient.              |

**Table 2.** Table S2: Parameters that impact the size of the image descriptors

|                        |                                                                              |
|------------------------|------------------------------------------------------------------------------|
| HOG                    |                                                                              |
| Position descriptor    | $b_{hp} \Rightarrow$ bins per histogram in the position descriptor.          |
|                        | $k_{hp} \Rightarrow$ number of horizontal cells in the position descriptor.  |
| Orientation descriptor | $b_{ho} \Rightarrow$ bins per histogram in the orientation descriptor.       |
|                        | $k_{ho} \Rightarrow$ number of vertical cells in the orientation descriptor. |
|                        | $dist_{ho} \Rightarrow$ distance between consecutive vertical cells.         |
| Gist                   |                                                                              |
| Position descriptor    | $m_{gp} \Rightarrow$ number of Gabor filters in the position descriptor.     |
|                        | $k_{gp} \Rightarrow$ horizontal cells in the position descriptor.            |
|                        | $r_{gp} \Rightarrow$ resolution models in the position descriptor.           |
| Orientation descriptor | $m_{go} \Rightarrow$ Gabor filters in the orientation descriptor.            |
|                        | $k_{go} \Rightarrow$ vertical cells in the orientation descriptor            |
|                        | $r_{go} \Rightarrow$ resolution models in the orientation descriptor.        |
|                        | $dist_{go} \Rightarrow$ distance between consecutive vertical cells.         |

**Table 3.** Table S3: Symbols used in the hierarchical incremental mapping processes

| Symbol                              | Definition                                                                                  |
|-------------------------------------|---------------------------------------------------------------------------------------------|
| $I_q$                               | New acquired image.                                                                         |
| $\vec{d}_q$                         | New image's descriptor.                                                                     |
| $N^C$                               | Set of clusters currently contained in the map.                                             |
| $C$                                 | Current number of clusters.                                                                 |
| <b>Node Level Loop Closure</b>      |                                                                                             |
| $N^*$                               | Group of nodes that meet Node Level Loop Closure condition.                                 |
| $N_l$                               | Node evaluated in the Node Level Loop Closure condition.                                    |
| $\vec{\mu}^{N_l}$                   | Mean descriptor of $N_l$ (eq. ??).                                                          |
| $\Sigma^{N_l}$                      | Covariance matrix of $N_l$ (eq. ??).                                                        |
| $\Delta_{\vec{d}_q}^{N_l}$          | Mahalanobis distance between $\vec{d}_q$ and $N_l$ (eq. ??).                                |
| $\mu_{ns}^{N_l}$                    | Mean deviation of Mahalanobis distances (eq. ??).                                           |
| $\sigma_{ns}^{N_l}$                 | Standard deviation of Mahalanobis distances (eq. ??).                                       |
| $x$                                 | It modifies eq. ?? . The value depends on the number of clusters.                           |
| $\Omega$                            | <i>Tuned parameter</i> . It limits the minimum value of $x$ .                               |
| <b>Image Level Loop Closure</b>     |                                                                                             |
| $I_i$                               | Image detected as the most similar one to $I_q$ after the Image Level Loop Closure process. |
| $N_i$                               | Node which $I_i$ belongs to.                                                                |
| $I^{N^*}$                           | All the images that are included in the nodes $N^*$ .                                       |
| $\vec{d}_k$                         | Descriptors of the images $I^{N^*}$ evaluated in the Image Level Loop Closure process.      |
| $dist_{euc}^{\vec{d}_k, \vec{d}_q}$ | Euclidean distance between $\vec{d}_q$ and $\vec{d}_k$ (eq. ??).                            |
| $sim_{\vec{d}_q}^{\vec{d}_k}$       | Similarity between descriptors $\vec{d}_q$ and $\vec{d}_k$ (eq. ??).                        |
| <b>Prominence Condition</b>         |                                                                                             |
| $P_{I_i}$                           | The prominence value of the candidate image $I_i$ (eq. ??).                                 |
| $\mu(P_{I_k^*})$                    | The mean prominence of the candidate images contained in $N^*$ (eq. ??).                    |
| $\gamma$                            | <i>Tuned parameter</i> . It limits the minimum difference in eq.??.                         |
| <b>Node Merging Process</b>         |                                                                                             |
| $N_o$                               | An existing node which is evaluated in the node merging condition.                          |
| $N_q$                               | Newly created node whose distance to previous nodes is evaluated in eq. ??.                 |
| $\Delta_{N_q}^{N_o}$                | Mahalanobis distance between nodes $N_q$ and $N_o$ (eq. ??).                                |
| $\mu^{N_q}$                         | Mean descriptor of $N_q$ (eq. ??).                                                          |
| $\mu^{N_o}$                         | Mean descriptor of $N_o$ (eq. ??).                                                          |
| $\Sigma_d^{N_o}$                    | Covariance matrix of $N_o$ (eq. ??).                                                        |
| $y$                                 | <i>Tuned parameter</i> . It restricts the node merging condition (eq.??)                    |

**Table 4.** Table S4: Parameters that need to be tuned

| Parameter | Definition                                        | Values                            |
|-----------|---------------------------------------------------|-----------------------------------|
| $\Omega$  | It limits the minimum value of $x$ .              | 1.7, 1.85, 2, 2.15, 2.3           |
| $\gamma$  | It limits the minimum difference in eq.??.        | Tuned experimentally $\gamma = 5$ |
| $y$       | It restricts the node merging condition in eq.??. | 0.75, 1, 1.25, 1.5, 1.75, 2, 2.25 |

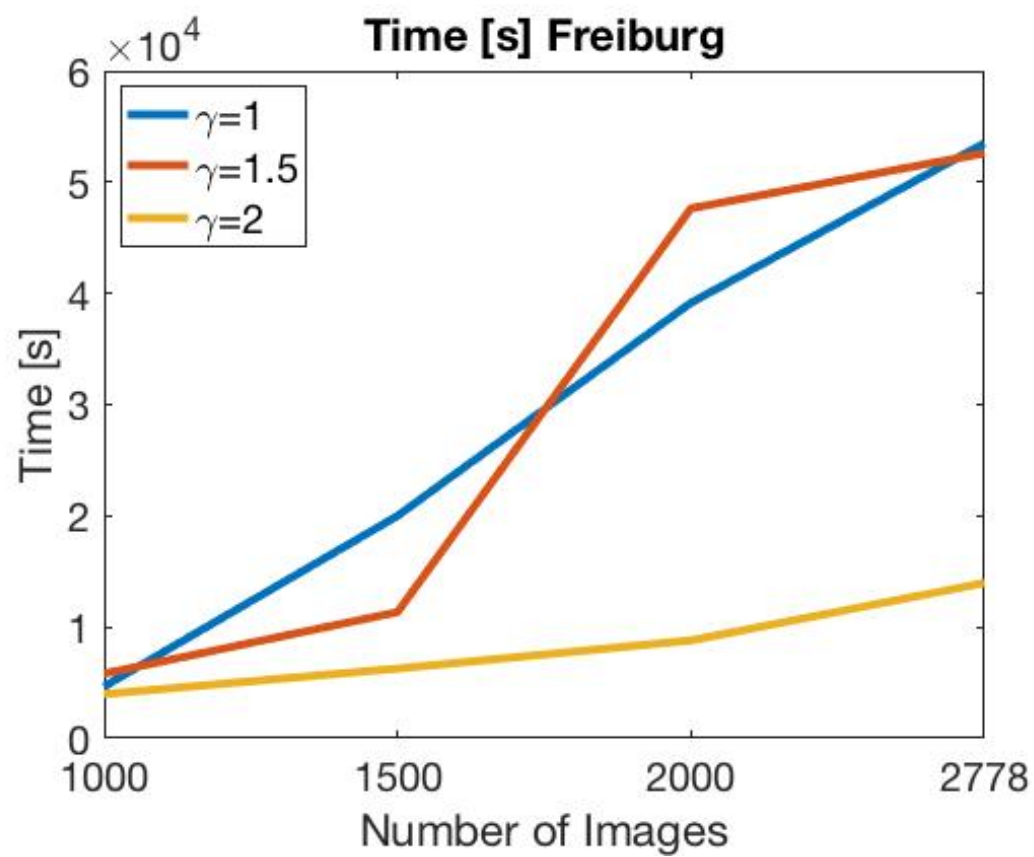

**Figure 1.** Figure S1. Time of the process [s] using HOG descriptor depending on the number of images that it contains and  $\gamma$  parameter.

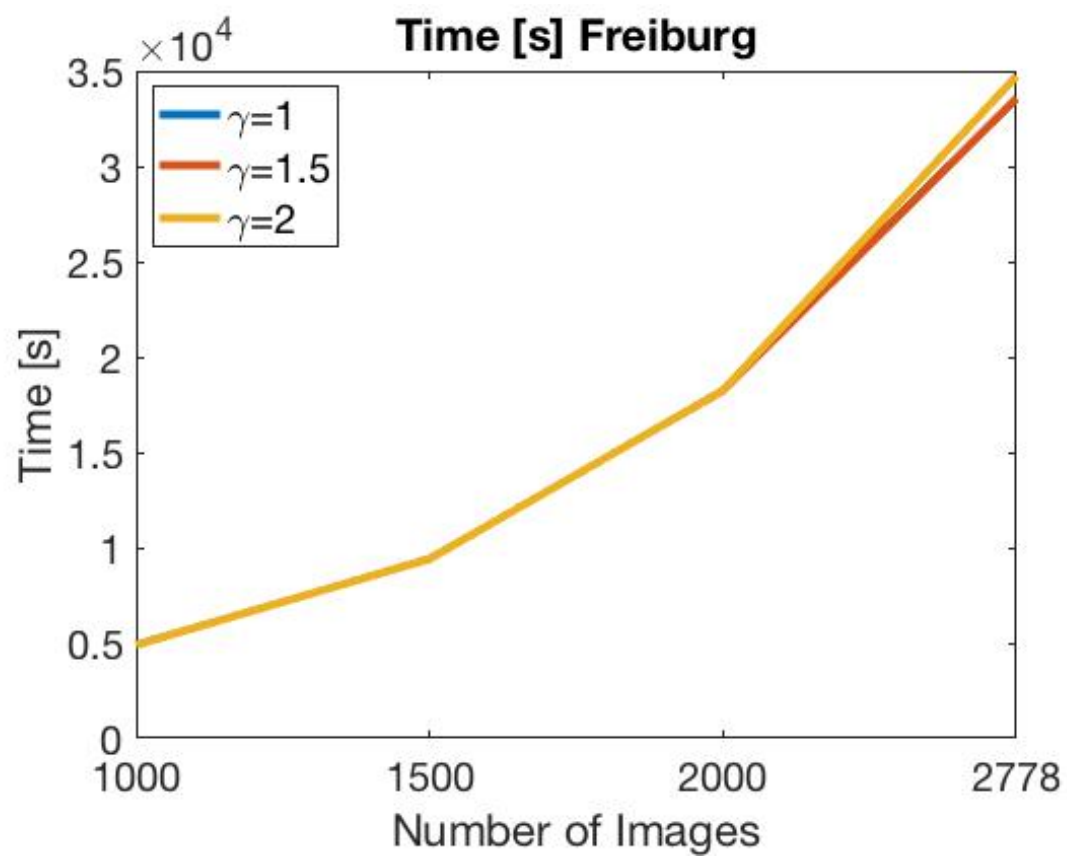

**Figure 2.** Figure S2. Time of the process [s] using gist descriptor depending on the number of images that it contains and  $\gamma$  parameter.

**Acknowledgments:** This work has been supported by the Generalitat Valenciana and the FSE through the grants ACIF/2018/224 and ACIF/2017/146, by the Spanish government through the project DPI 2016-78361-R (AEI/FEDER, UE): “Creación de mapas mediante métodos de apariencia visual para la navegación de robots.” and by Generalitat Valenciana through the project AICO/2019/031: “Creación de modelos jerárquicos y localización robusta de robots móviles en entornos sociales”

**Author Contributions:** L.P. and O.R. conceived and designed the experiments; V.R. and S.C. performed the experiments; V.R., L.P. and S.C. analyzed the data; V.R. and L.P. implemented the necessary software. The paper was written and revised collaboratively by all the authors.

**Conflicts of Interest:** The authors declare no conflict of interest. The founding sponsors had no role in the design of the study; in the collection, analyses, or interpretation of data; in the writing of the manuscript, and in the decision to publish the results.

## References

© 2020 by the authors. Submitted to *Appl. Sci.* for possible open access publication under the terms and conditions of the Creative Commons Attribution license (<http://creativecommons.org/licenses/by/4.0/>)
