# Supplementary material
Source: MDPI journal article supplement (https://www.mdpi.com/2076-3417/10/18/6480)
Supplement: s1 [file s1]

# Supplementary Materials: Creating incremental models of indoor environments through omnidirectional imaging

Vicente Román \*, Luis Payá , Sergio Cebollada , Óscar Reinoso

Version September 17, 2020 submitted to Appl. Sci.; Typeset by L<sup>A</sup>T<sub>E</sub>X using class file mdpi.cls

**Table S1.** General Parameters of the Global Appearance Descriptors

| Parameter | Definition                                |
|-----------|-------------------------------------------|
| $N_x$     | Number of rows of the panoramic image.    |
| $N_y$     | Number of columns of the panoramic image. |
| $D_x$     | Derivative of the image regarding axis x. |
| $D_y$     | Derivative of the image regarding axis y. |
| $G$       | Module of the gradient.                   |
| $\theta$  | Orientation of the gradient.              |

**Table S2.** Parameters that impact the size of the image descriptors

|                        |                                                                              |
|------------------------|------------------------------------------------------------------------------|
| HOG                    |                                                                              |
| Position descriptor    | $b_{hp} \Rightarrow$ bins per histogram in the position descriptor.          |
|                        | $k_{hp} \Rightarrow$ number of horizontal cells in the position descriptor.  |
| Orientation descriptor | $b_{ho} \Rightarrow$ bins per histogram in the orientation descriptor.       |
|                        | $k_{ho} \Rightarrow$ number of vertical cells in the orientation descriptor. |
|                        | $dist_{ho} \Rightarrow$ distance between consecutive vertical cells.         |
| Gist                   |                                                                              |
| Position descriptor    | $m_{gp} \Rightarrow$ number of Gabor filters in the position descriptor.     |
|                        | $k_{gp} \Rightarrow$ horizontal cells in the position descriptor.            |
|                        | $r_{gp} \Rightarrow$ resolution models in the position descriptor.           |
| Orientation descriptor | $m_{go} \Rightarrow$ Gabor filters in the orientation descriptor.            |
|                        | $k_{go} \Rightarrow$ vertical cells in the orientation descriptor            |
|                        | $r_{go} \Rightarrow$ resolution models in the orientation descriptor.        |
|                        | $dist_{go} \Rightarrow$ distance between consecutive vertical cells.         |

**Table S3.** Symbols used in the hierarchical incremental mapping processes

| Symbol                               | Definition                                                                                  |
|--------------------------------------|---------------------------------------------------------------------------------------------|
| $I_q$                                | New acquired image.                                                                         |
| $\vec{d}_q$                          | New image's descriptor.                                                                     |
| $N^C$                                | Set of clusters currently contained in the map.                                             |
| $C$                                  | Current number of clusters.                                                                 |
| <b>Node Level Loop Closure</b>       |                                                                                             |
| $N^*$                                | Group of nodes that meet Node Level Loop Closure condition.                                 |
| $N_l$                                | Node evaluated in the Node Level Loop Closure condition.                                    |
| $\vec{\mu}^{N_l}$                    | Mean descriptor of $N_l$ (Equation 3).                                                      |
| $\Sigma^{N_l}$                       | Covariance matrix of $N_l$ (Equation 3).                                                    |
| $\Delta_{\vec{d}_q}^{N_l}$           | Mahalanobis distance between $\vec{d}_q$ and $N_l$ (Equation 3).                            |
| $\mu_{ns}^{N_l}$                     | Mean deviation of Mahalanobis distances (Equation 4).                                       |
| $\sigma_{ns}^{N_l}$                  | Standard deviation of Mahalanobis distances (Equation 4).                                   |
| $x$                                  | It modifies Equation 4. The value depends on the number of clusters.                        |
| $\Omega$                             | <i>Tuned parameter.</i> It limits the minimum value of $x$ .                                |
| <b>Image Level Loop Closure</b>      |                                                                                             |
| $I_i$                                | Image detected as the most similar one to $I_q$ after the Image Level Loop Closure process. |
| $N_i$                                | Node which $I_i$ belongs to.                                                                |
| $I^{N^*}$                            | All the images that are included in the nodes $N^*$ .                                       |
| $\vec{d}_k$                          | Descriptors of the images $I^{N^*}$ evaluated in the Image Level Loop Closure process.      |
| $dist_{eucl}^{\vec{d}_k, \vec{d}_q}$ | Euclidean distance between $\vec{d}_q$ and $\vec{d}_k$ (Equation 5).                        |
| $sim_{\vec{d}_k, \vec{d}_q}$         | Similarity between descriptors $\vec{d}_q$ and $\vec{d}_k$ (Equation 6).                    |
| <b>Prominence Condition</b>          |                                                                                             |
| $P_{I_i}$                            | The prominence value of the candidate image $I_i$ (Equation 8).                             |
| $\mu(P_{I_k^*})$                     | The mean prominence of the candidate images contained in $N^*$ (Equation 8).                |
| $\gamma$                             | <i>Tuned parameter.</i> It limits the minimum difference in Equation 8.                     |
| <b>Node Merging Process</b>          |                                                                                             |
| $N_o$                                | An existing node which is evaluated in the node merging condition.                          |
| $N_q$                                | Newly created node whose distance to previous nodes is evaluated in Equation 10.            |
| $\Delta_{N_q}^{N_o}$                 | Mahalanobis distance between nodes $N_q$ and $N_o$ (Equation 10).                           |
| $\mu^{N_q}$                          | Mean descriptor of $N_q$ (Equation 10).                                                     |
| $\mu^{N_o}$                          | Mean descriptor of $N_o$ (Equation 10).                                                     |
| $\Sigma_d^{N_o}$                     | Covariance matrix of $N_o$ (Equation 10).                                                   |
| $y$                                  | <i>Tuned parameter.</i> It restricts the node merging condition (Equation 11)               |

**Table S4.** Parameters that need to be tuned

| Parameter | Definition                                              | Values                            |
|-----------|---------------------------------------------------------|-----------------------------------|
| $\Omega$  | It limits the minimum value of $x$ .                    | 1.7, 1.85, 2, 2.15, 2.3           |
| $\gamma$  | It limits the minimum difference in Equation 8.         | Tuned experimentally $\gamma = 5$ |
| $y$       | It restricts the node merging condition in Equation 11. | 0.75, 1, 1.25, 1.5, 1.75, 2, 2.25 |

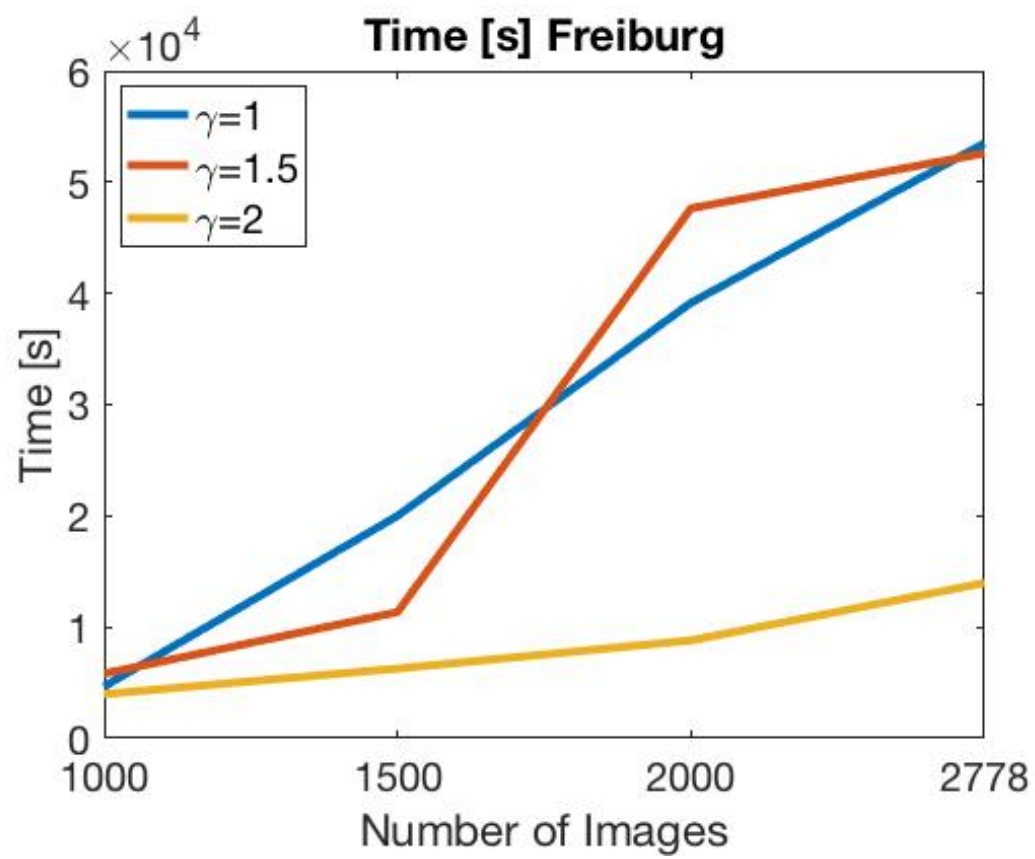

**Figure S1.** Time of the process [s] using HOG descriptor depending on the number of images that it contains and  $\gamma$  parameter.

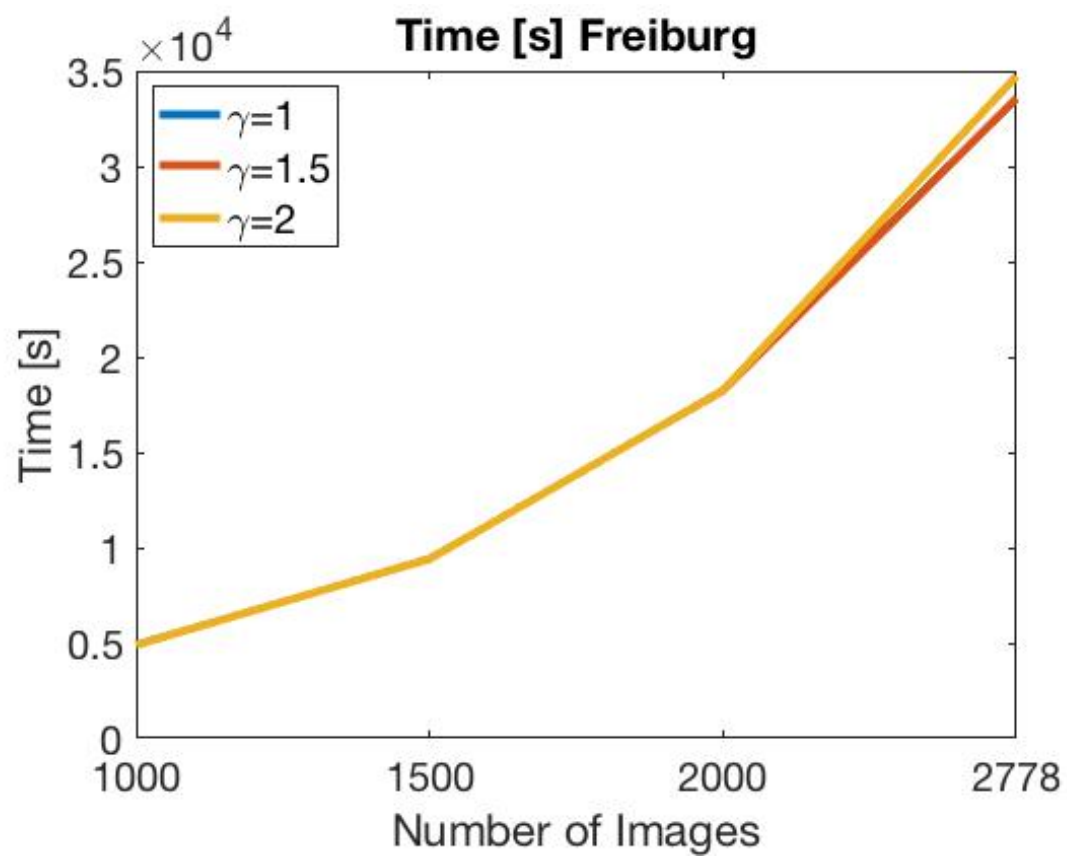

**Figure S2.** Time of the process [s] using gist descriptor depending on the number of images that it contains and  $\gamma$  parameter.

- 1   © 2020 by the authors. Submitted to *Appl. Sci.* for possible open access publication under the terms and
- 2   conditions of the Creative Commons Attribution license (<http://creativecommons.org/licenses/by/4.0/>)
