# Supplementary material
Source: MDPI journal article supplement (https://www.mdpi.com/2076-3417/10/18/6480)
Supplement: s1 [file s1]

A dark blue outline of a house with a gabled roof and a chimney on the left side. The letters 'MDPI' are centered within the house's frame.

**MDPI**
